# Supplementary material for: Insight into the mechanism of photocatalytic degradation of gaseous o-dichlorobenzene over flower-type V2O5 hollow spheres
Source: Royal Society of Chemistry journal article supplement (doi:10.1039/c5ta02295a), 2015-01-01
Supplement: c5ta02295a1.pdf [file c5ta02295a1.pdf]

## Supplementary Information

### Insight into the Mechanism of Photocatalytic Degradation of Gaseous *o*-dichlorobenzene over Flower-Type V<sub>2</sub>O<sub>5</sub> Hollow spheres

*Baojun Liu*<sup>†</sup>, *Xinyong Li*<sup>\*†‡</sup>, *Qidong Zhao*<sup>†</sup>, *Jie Liu*<sup>†</sup>, *Shaomin Liu*<sup>‡</sup>, *Shaobin Wang*<sup>‡</sup>,

*Moses Tade*<sup>‡</sup>

<sup>†</sup>State Key Laboratory of Fine Chemicals, Key Laboratory of Industrial Ecology and Environmental Engineering (MOE), School of Environmental Science and Technology, Dalian University of Technology, Dalian 116024, China

<sup>‡</sup>Department of Chemical Engineering, Curtin University, GPO Box U1987, Perth, WA 6845, Australia

\*Corresponding author: Tel: +86-411-8470-7733; Fax: +86-411-8470-7733;

E-mail: [xyli@dlut.edu.cn](mailto:xyli@dlut.edu.cn)

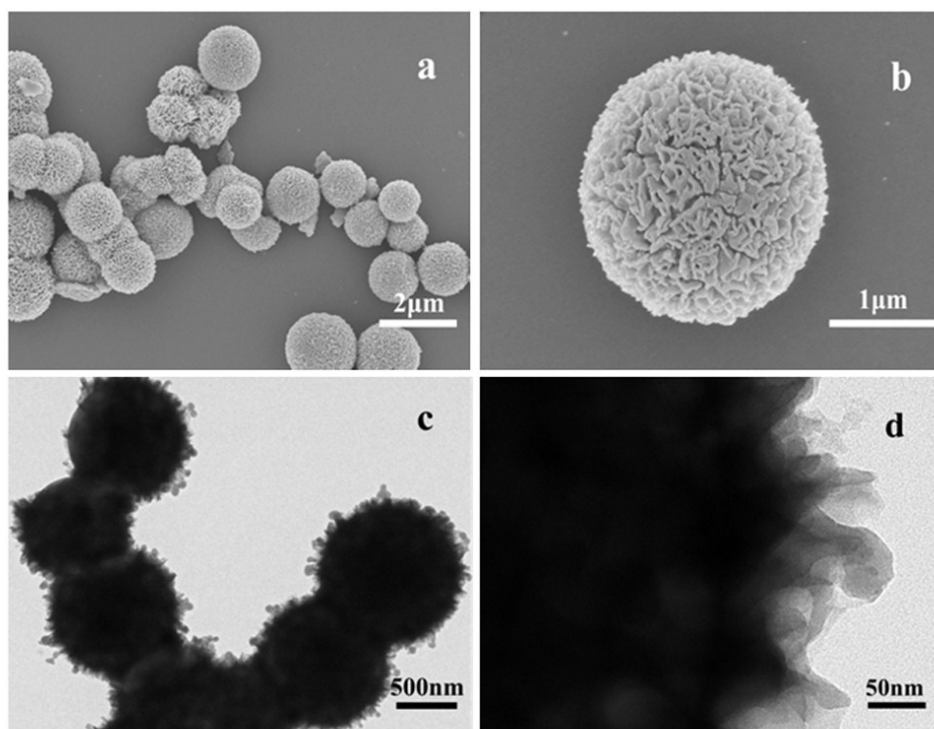

**Fig. S1** (a, b) The FESEM images of the precursors of  $V_2O_5$  hollow spheres. (c, d) TEM images of the precursors of  $V_2O_5$  hollow spheres.

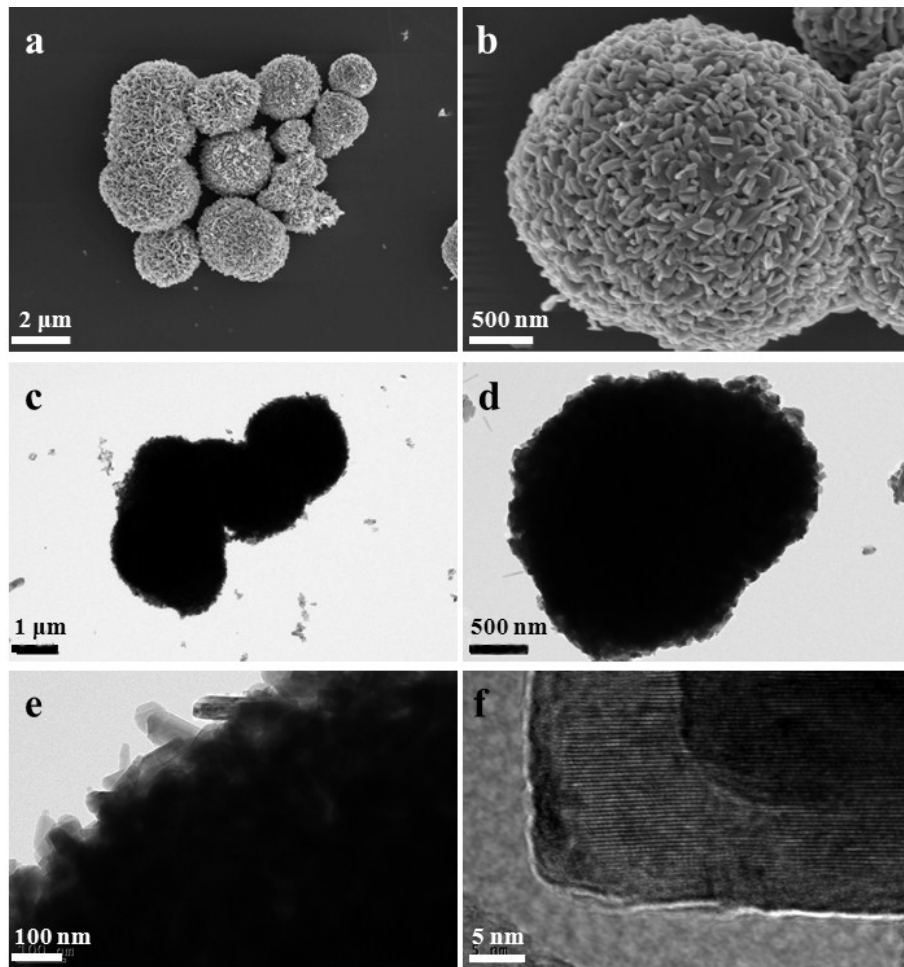

**Fig. S2** (a, b) The FESEM images of  $V_2O_5$  solid spheres. (c-f) The TEM and HRTEM images of  $V_2O_5$  solid spheres, respectively

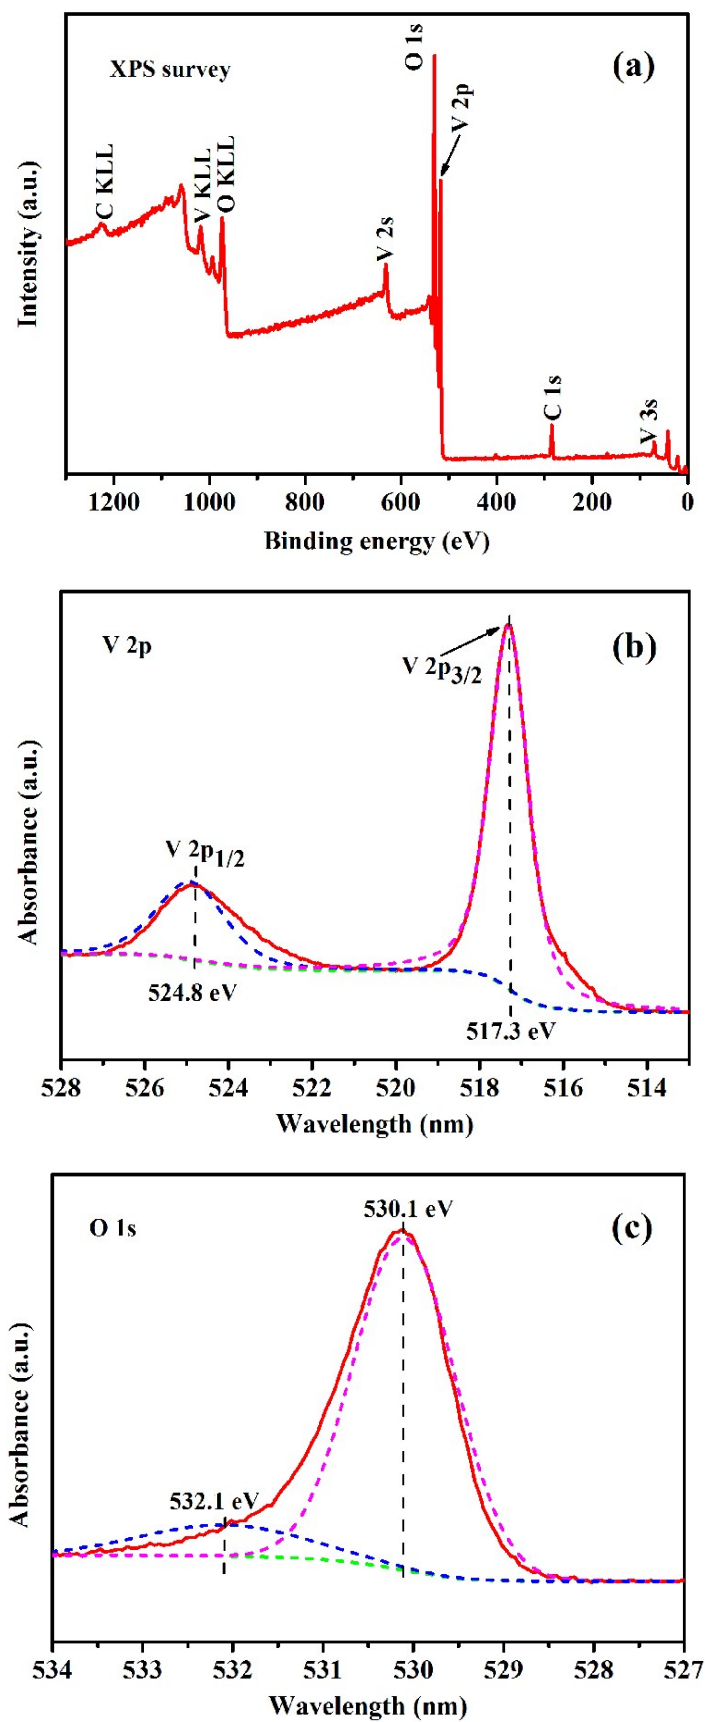

**Fig. S3** The XPS spectra of the  $V_2O_5$  sample, (a) survey of the sample, (b) V 2p spectrum and (d) O 1s spectrum.
